# Supplementary material for: Transcriptome Analysis of Zebrafish Embryogenesis Using Microarrays
Source: PubMed Central journal article supplement (PMC1193535; doi:10.1371/journal.pgen.0010029), 2005-08-26

Figure S4

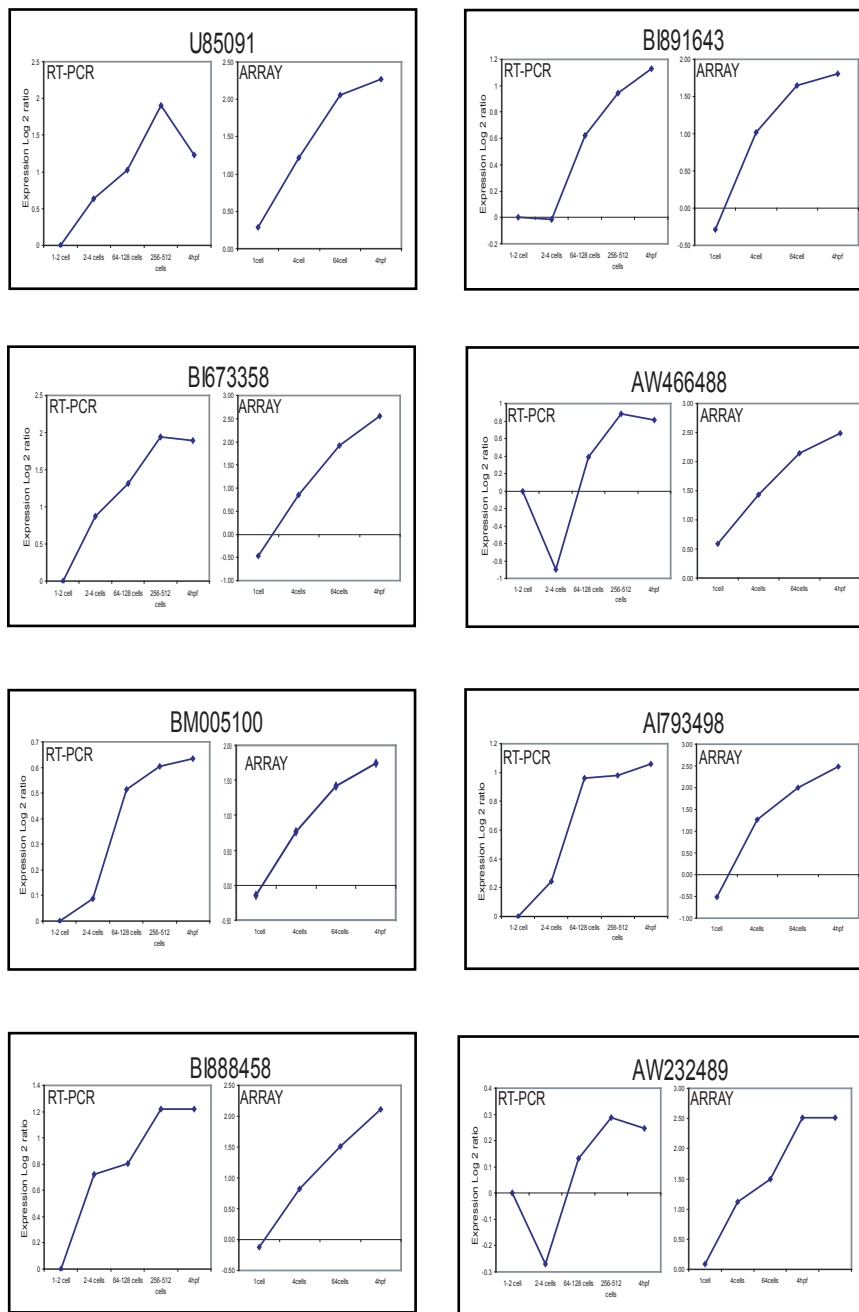

Supplement: pgen.0010029.sg004.pdf [file pgen.0010029.sg004.pdf]
