# Supplementary material for: Transcriptome Analysis of Zebrafish Embryogenesis Using Microarrays
Source: PubMed Central journal article supplement (PMC1193535; doi:10.1371/journal.pgen.0010029), 2005-08-26
Supplement: pgen.0010029.sg005.pdf [file pgen.0010029.sg005.pdf]

**Expression of early genes at other stages of development**

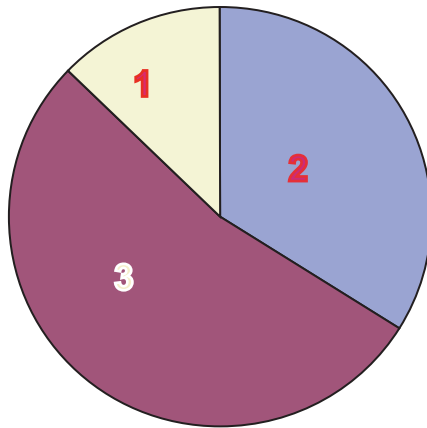

- 1. Peak at maternal stage (13%)
- 2. Peak at blastula stage (34%)
- 3. Peak at gastrula stage (53%)

**Classification of early genes based on functions**

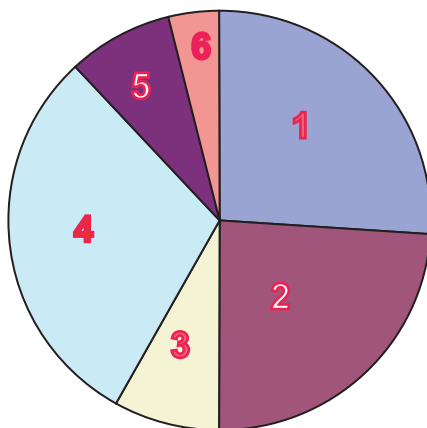

- 1. ATP binding/protein folding/biosynthesis (26%).
- 2. DNA/RNA binding/development (24%).
- 3. Cell cycle/regulation (8%)
- 4. Metabolism/transport (30%)
- 5. GTP binding activity (8%)
- 6. Others (4%)

**Distribution of early gene function at different developmental stages. Values are in percent.**
