# Supplementary material for: Transcriptome Analysis of Zebrafish Embryogenesis Using Microarrays
Source: PubMed Central journal article supplement (PMC1193535; doi:10.1371/journal.pgen.0010029), 2005-08-26
Supplement: pgen.0010029.st001.pdf [file pgen.0010029.st001.pdf]

**Table S1. Comparison of expression profile of selected genes in microarray analysis and other methods of transcript detection ( Northern/ in situ).**

| Gene Name                | Microarray Results                                                                       | Supporting Data                                                                                                                                   |                                                                                                                                              |
|--------------------------|------------------------------------------------------------------------------------------|---------------------------------------------------------------------------------------------------------------------------------------------------|----------------------------------------------------------------------------------------------------------------------------------------------|
|                          |                                                                                          | Northern blot                                                                                                                                     | in situ                                                                                                                                      |
| Egg envelope protein ZP2 | Expressed highly during Oocyte stage only                                                | Transcripts detected only at oocyte stage. (Wang H and Gong Z.2000)                                                                               |                                                                                                                                              |
| Sox31                    | Expressed highly at blastula stage and continues till early gastrula.                    |                                                                                                                                                   | Maternally expressed and maximum expression extended to blastula stage( Girard et al. 2001)                                                  |
| Tumor suppressor P53     | Expressed from zygote to early segmentation stage after which it declines                | Transcript is most abundant in zygotes and early cleavage embryos thereafter declining to barely detectable levels at 48 hpf. (Cheng et al. 1997) |                                                                                                                                              |
| Cyclin D1                | Highly expressed all stages except at oocyte and cleavage stage.                         | Transcripts are first detected at epiboly and continues till somitogenesis. (Yarden et al. 1995)                                                  |                                                                                                                                              |
| Pax6                     | Expressed at late gastrula stage and continues till 48 hours                             |                                                                                                                                                   | Transcripts are first observed in neural plate( 10 hpf) and are detected at later stages in hindbrain (24 hpf ). (Amirthalingam et al. 1995) |
| Beta-thymosin            | Transcripts detected from 2 somite stage (10.7 hpf) and the maximum at 48 hpf            | Transcripts are first seen at 12 hpf and maximum at hatching (Roth et al. 1999)                                                                   |                                                                                                                                              |
| Connexin (cx43.4)        | Expressed from 3 hpf with a maximum at 70 % epiboly(7.7 hpf) and continued till hatching | Transcripts are abundant at shield stage (6 hpf) and expressed till hatching. (Essner et al. 1996)                                                |                                                                                                                                              |
