# Supplementary material for: Transcriptome Analysis of Zebrafish Embryogenesis Using Microarrays
Source: PubMed Central journal article supplement (PMC1193535; doi:10.1371/journal.pgen.0010029), 2005-08-26
Supplement: pgen.0010029.st002.pdf [file pgen.0010029.st002.pdf]

**Table S2: Characteristics of developmental stages of embryos that were collected for the expression profile analysis in this work.**

|    | <b>Developmental stages</b>  | <b>Characteristics</b>                                                                                                                  |
|----|------------------------------|-----------------------------------------------------------------------------------------------------------------------------------------|
| 1  | Unfertilized egg             | Unfertilized eggs, maternal mRNA                                                                                                        |
| 2  | High stage (3 hpf)           | Early post-MBT embryo, transcripts that could be linked to activation of transcription, early zygotic transcripts, yolk syncytial layer |
| 3  | 30% epiboly (4.5 hpf)        | Early post-MBT embryo, early zygotic transcripts                                                                                        |
| 4  | Shield stage (6 hpf)         | Determinants of germ layers, axis determinants                                                                                          |
| 5  | 70% epiboly (7.7 hpf)        | Determinants of germ layers and embryonic axis                                                                                          |
| 6  | 90% epiboly (9 hpf)          | Determinants of determination of primary neurons                                                                                        |
| 7  | 2 somite stage (10.7 hpf)    | Determinants of neural determination and differentiation                                                                                |
| 8  | 5-6 somite stage (12 hpf)    | Determinants of neural determination and differentiation<br>Determinants of organogenesis                                               |
| 9  | 12-14 somites stage (15 hpf) | Determinants of neural determination, differentiation, axonal outgrowth, liver, pancreas                                                |
| 10 | Prim 5 stage (24 hpf)        | Determinants of secondary neurogenesis, endoderm, heart, limbs, fins                                                                    |
| 11 | Prim 15 stage (30 hpf)       | Determinants of endoderm, foregut, gliogenesis                                                                                          |
| 12 | Late organogenesis (48 hpf)  | Determinants of late differentiation, hatching                                                                                          |
