# Supplementary material for: Transcriptome Analysis of Zebrafish Embryogenesis Using Microarrays
Source: PubMed Central journal article supplement (PMC1193535; doi:10.1371/journal.pgen.0010029), 2005-08-26
Supplement: pgen.0010029.st003.pdf [file pgen.0010029.st003.pdf]

| Table S3: Subset of Zebrafish early genes with human and mouse orthologs |              |             |                                                   |             |                |                |                                          |
|--------------------------------------------------------------------------|--------------|-------------|---------------------------------------------------|-------------|----------------|----------------|------------------------------------------|
| Genbank ID(ZF)                                                           | Zebrafish ID | Entrez Gene | Unigene Name (zebrafish)                          | Gene symbol | Human ID       | Human ortholog | Human Gene description                   |
| AW116838                                                                 | Dr.19225     | 336425      | Aldolase a, fructose-bisphosphate                 | aldoa       | Hs.155247      | ALDOA          | Fructose-bisphosphate aldolase           |
| BM005100                                                                 | Dr.5438      | 327026      | ADP-ribosylation factor 1 like                    | arf1l       | Hs.119177  Hs. | ARF1_HUMAN     | ADP-ribosylation factor 1                |
| AW076882                                                                 | Dr.6582      | 403025      | Cancer susceptibility candidate 3                 | casc3       | Hs.350229      | CASC3          | Cancer susceptibility candidate 3        |
| AI437239                                                                 | Dr.6928      | 116994      | Chaperonin containing TCP1, subunit 6A            | cct6a       | Hs.73072  Hs.  | CCT6A          | T-complex protein 1, zeta subunit        |
| BE557308                                                                 | Dr.134       | 192324      | Chaperonin containing TCP1, subunit 7             | cct7        | Hs.368149      | CCT7           | T-complex protein 1, eta subunit         |
| BG303647                                                                 | Dr.26326     | 321602      | Cyclin-dependent kinase 9 (CDC2-related kinase 9) | cdk9        | Hs.150423      | CDK9           | Cell division protein kinase 9           |
| AB040044                                                                 | Dr.8161      | 57970       | Coatomer protein complex, subunit zeta-2          | copz1       | Hs.37482  Hs.  | Copz2          | Coatomer zeta-2 subunit                  |
| BI888253                                                                 | Dr.20911     | 30436       | Eyes absent homolog 1                             | eya1        | Hs.491997      | EYA4           | Eyes absent homolog 4                    |
| AI878758                                                                 | Dr.3225      | 317737      | Glutamate dehydrogenase 1a                        | glud1a      | Hs.368538  Hs. | GLUD1          | Glutamate dehydrogenase 1, mitochondrial |
| AW128619                                                                 | Dr.1388      | 325284      | G1 to S phase transition 1                        | gspt1       | Hs.59523  Hs.  | GSPT1          | G1 to S phase transition protein 1       |
| AF412832                                                                 | Dr.12595     | 140427      | Heat shock factor 2                               | hsf2        | Hs.158195      | HSF2           | Heat shock factor protein 2              |
| D38454                                                                   | Dr.20916     | 30151       | Insulin gene enhancer protein 1-like 3            | isl3        | Hs.444677      | ISL2           | Insulin gene enhancer protein 1-like 3   |
| AY052752                                                                 | Dr.7485      | 170444      | Pbx/knotted 1 homeobox 1.1                        | pknox1.1    | Hs.431043      | PKNOX1         | Homeobox protein PKNOX1                  |
| AW305657                                                                 | Dr.1375      | 336786      | Proteasome (prosome, macropain) 2                 | psmc1       | Hs.131528  Hs. | PRS4_HUMAN     | 26S protease regulatory subunit 4        |
| AW116396                                                                 | Dr.11425     | 327512      | Phosphoserine aminotransferase 1                  | psat1       | Hs.494261      | PSAT1          | Phosphoserine aminotransferase 1         |
| BE558184                                                                 | Dr.1119      | 322129      | Retinoblastoma binding protein 4, like 1          | rbb4l       | Hs.16003       | RBBP7          | Histone acetyltransferase type II        |
| AA495420                                                                 | Dr.11588     | 334757      | Sideroflexin 2                                    | sfxn2       | Hs.44070       | SFXN2          | Sideroflexin 2                           |
| AI545320                                                                 | Dr.3018      | 323071      | Transcription elongation regulator 1              | tcerg1      | Hs.443465      | TCERG1         | Transcription elongation regulator 1     |
| AY029577                                                                 | Dr.12594     | 140614      | X-box binding protein 1                           | xbp1        | Hs.437638      | XBP-1          | X box binding protein-1                  |
| AW777876                                                                 | Dr.9798      | 368235      | Tyrosyl-tRNA synthetase                           | yars        | Hs.213264      | YARS           | Tyrosyl-tRNA synthetase, cytoplasmic     |
| U85091                                                                   | Dr.5112      | 30603       | SRY-box containing gene 11b                       | sox11b      |                |                |                                          |
| BM023680                                                                 | Dr.26724     | 321659      | Zinc finger RNA binding protein                   | zfr         |                |                |                                          |
